# Supplementary material
Source: HighWire-hosted journal article supplement (https://openres.ersjournals.com/content/9/2/00605-2022)
Supplement: inline-supplementary-material-1 [file inline-supplementary-material-1.pdf]

# **Nebulised interferon beta1a (SNG001) in hospitalised COVID-19: SPRINTER Phase III Study**

Phillip D Monk, Jody L Brookes, Victoria J Tear, Toby N Batten, Marcin Mankowski, Tatjana Adzic-Vukicevic, Michael G Crooks, Davinder PS Dosanjh, Monica Kraft, Christopher E Brightling, Felicity J Gabbay, Stephen T Holgate, Ratko Djukanovic, Tom MA Wilkinson, on behalf of the SPRINTER Study Group

## **Supplement**

## The SPRINTER Study Group

In addition to the authors and the investigators, the SPRINTER Study Group included the below people.

| Affiliation                                                               | Title, name and highest degree                           |
|---------------------------------------------------------------------------|----------------------------------------------------------|
| Synairgen Research Ltd., Southampton<br>General Hospital, Southampton, UK | Mrs R Beegan BSc<br>Dr S Dudley PhD<br>Dr S Reynolds PhD |
| SEH Clinical Research Ltd, Sarisbury Green,<br>Southampton, UK            | Mrs S Hemmings BSc (Hons)                                |
| tranScrip Limited, Wokingham, UK                                          | Dr Dominic Bowers MRCA<br>Dr Stephen P Jones PhD         |
| MG Clinical Ltd, Crewe, UK                                                | Ms Mandy Garrett MRPharms                                |

## List of investigators

| Title | First Name     | Last Name         | Address                                                     | Country   |
|-------|----------------|-------------------|-------------------------------------------------------------|-----------|
| Dr    | Ricardo        | Leon de la Fuente | Hospital Papa Francisco - Hospital                          | Argentina |
| Dr    | Gonzalo        | Perez Marc        | Hospital Militar Central Cirujano Mayor Cosme Argerich      | Argentina |
| Dr    | Marcelo Oscar  | Silva             | Hospital Universitario Austral                              | Argentina |
| Prof  | Michel         | Moutschen         | CHU de Liège - Domaine Universitaire du Sart Tilman         | Belgium   |
|       | Mathias        | Leys              | AZ Groeninge - Campus Kennedylaan                           | Belgium   |
| Dr    | Laura          | Gaspard           | CHR de la Citadelle - Site Citadelle - Infectiologie        | Belgium   |
| Dr    | Philippe       | Clevenbergh       | CHU Brugmann                                                | Belgium   |
| Prof  | Sabine         | Allard            | UZ Brussel - Infectiologie                                  | Belgium   |
| Mr    | Felipe         | Pizzol            | Hospital Sao Jose                                           | Brazil    |
| Dr    | José Francisco | Saraiva           | Instituto de Pesquisa Clínica de Campinas                   | Brazil    |
| Prof  | Suzana         | Lobo              | Hospital de Base                                            | Brazil    |
| Mrs   | Tiago          | Simon             | Instituto Mederi de Pesquisa e Saúde                        | Brazil    |
| Dr    | Cristiano      | Devenci Vendrame  | Clínica SUPERA                                              | Brazil    |
| Dr    | Regis          | Rosa              | Hospital Moinhos de Vento                                   | Brazil    |
| Dr    | Jaime          | Gomez Ayala       | FOSCAL                                                      | Colombia  |
| Dr    | Andres         | Cadena Bonfanti   | Clínica de la Costa Ltda.                                   | Colombia  |
| Dr    | Fernando       | Montoya Agudelo   | Clinica de la Mujer                                         | Colombia  |
| Prof  | François       | Raffi             | CHU De Nantes - Infectious Diseases                         | France    |
| Prof  | Jean-Benoit    | Arlet             | Hôpital Européen Georges-Pompidou - HEGP - Médecine Interne | France    |
| Dr    | Karine         | Lacombe           | CHU - HÃ´pital Saint-Antoine - Maladies Infectieuses        | France    |
| Prof  | Olivier        | EPAULARD          | CHU de Grenoble - Hôpital Albert Michallon                  | France    |
| Dr    | Jade           | Ghosn             | Hopital Bichat - Infectious Diseases                        | France    |
| Prof  | Vincent        | Dubée             | CHU d'Angers                                                | France    |
| Prof  | Stephan        | Budweiser         | RoMed Medical Center Rosenheim                              | Germany   |
| Prof  | Matthias       | Ebert             | Universit tsklinikum Mannheim                               | Germany   |
| Dr    | Simon          | Herkenrath        | Krankenhaus Bethanien gGmbH                                 | Germany   |
| Dr    | Namdev         | Jagtap            | VishwaRaj Hospital                                          | India     |
| Dr    | Anita          | Mathew            | Fortis Hospital Mulund - Internal Medicine                  | India     |
| Dr    | Yandrapati     | Raju              | King George Hospital                                        | India     |
| Dr    | Anil           | Kumar T           | M S Ramaiah Medical College and Hospitals                   | India     |
| Dr    | Rajendran      | Kannan            | Saveetha Medical College & Hospital                         | India     |
| Dr    | Nirav          | Bhalani           | Rhythm Heart Institute                                      | India     |
| Dr    | Prabhu         | Subramani         | Bangalore Medical College and Research Institute            | India     |
| Dr    | Sunil          | kumar             | Acharya Vinoba Bhave Rural Hospital                         | India     |

| Title | First Name     | Last Name          | Address                                                                   | Country     |
|-------|----------------|--------------------|---------------------------------------------------------------------------|-------------|
| Dr    | Jayaraju       | B. S.              | JSS Medical College and Hospital                                          | India       |
| Dr    | Milind         | Vyawahre           | Government Medical College Nagpur                                         | India       |
| Dr    | Kailash        | Rathi              | Suyog Hospital                                                            | India       |
| Dr    | Dipak          | Viradia            | Unity Hospital                                                            | India       |
| Dr    | Ashish         | Deshmukh           | Oriion Citicare Super Speciality Hospital - Internal Medicine             | India       |
| Dr    | Ami            | Mayo               | Assuta Ashdod University Hospital                                         | Israel      |
| Dr    | Galia          | Rahav              | The Chaim Sheba Medical Center                                            | Israel      |
| Dr    | Ronen          | Ben Ami            | Sourasky Tel Aviv Medical Center - Infectious Diseases                    | Israel      |
| Dr    | Dror           | Marchaim           | Assaf Harofeh Medical Center                                              | Israel      |
| Dr    | Kamal          | Abu Jabal          | Ziv Medical Center                                                        | Israel      |
| Dr    | Khetam         | Hussein            | Rambam Health Care Campus                                                 | Israel      |
| Prof  | Raffaele       | Bruno              | IRCCS Policlinico San Matteo                                              | Italy       |
| Dr    | Stefania       | Piconi             | PO A.Manzoni di Lecco, ASST Lecco                                         | Italy       |
| Prof  | Ivan           | Gentile            | AOU Federico II - Malattie Infettive                                      | Italy       |
| Prof  | Giuliano       | Rizzardini         | Ospedale Luigi Sacco, AO-PU                                               | Italy       |
| Dr    | Guido          | Chichino           | PO Civile SS.Antonio e Biagio                                             | Italy       |
| Dr    | Giovanna       | Travi              | Azienda Ospedaliera Niguarda Ca'Granda                                    | Italy       |
| Prof  | Marco          | Falcone            | AOU Pisana                                                                | Italy       |
| Dr    | Paolo          | Bonfanti           | Azienda Socio Sanitaria Territoriale - ASST di Monza - Malattie Infettive | Italy       |
| Dr    | francesco      | De Rosa            | A.O.U. Città della Salute e della Scienza di Torino                       | Italy       |
| Dr    | Juan           | Moreno Hoyos Abril | Fundación Santos y de la Garza Evia, I.B.P                                | Mexico      |
| Dr    | Jesus          | Simon-Campos       | Hospital General Dr. Agustin O'Horan                                      | Mexico      |
| Dr    | Jorge Alberto  | Zamudio Lerma      | Hospital General de Culiacan Dr. Bernardo J. Gastelum                     | Mexico      |
| Dr    | Juan Francisco | Rubio Suarez       | EME RED Hospitalaria - COVID-19 ward                                      | Mexico      |
| Dr    | Angel          | Aleman Marquez     | Clínica Sociedad Española de Beneficencia                                 | Mexico      |
| Dr    | Martijn        | Goosens            | Gelre Ziekenhuis Zutphen                                                  | Netherlands |
| Dr    | Jan Willem     | van den Berg       | Isala Klinieken                                                           | Netherlands |
| Dr    | Stephanus      | Gans               | Ziekenhuis St Jansdal                                                     | Netherlands |
| Dr    | Alexandre      | Carvalho           | Hospital de Braga                                                         | Portugal    |
| Dr    | Luis           | Malheiro           | C.H. de Vila Nova de Gaia/Espinho                                         | Portugal    |
| Dr    | Helena         | Sarmiento          | Hospital Senhora da Oliveira                                              | Portugal    |
| Dr    | Gonçalo        | Sarmiento Costa    | C Hosp de Entre Douro e Vouga                                             | Portugal    |
| Dr    | Ines           | Pintassilgo        | Hospital Garcia de Orta                                                   | Portugal    |
| Prof  | Dragos         | BUMBACEA           | Spit Univ de Urgenta Elias                                                | Romania     |
|       | Simin          | FLORESCU           | Sp CI de Boli Inf si Trop V Babes                                         | Romania     |
| Prof  | Cristian       | Oancea             | Sp CI de Boli Infec si Pneumo V Babes                                     | Romania     |
|       | Gheorghe       | Diaconescu         | Sp CI de Boli Infec si Pneumo V Babes                                     | Romania     |

| Title | First Name    | Last Name       | Address                                                             | Country        |
|-------|---------------|-----------------|---------------------------------------------------------------------|----------------|
| Prof  | Zorica        | Lazic           | Clinical Center Kragujevac                                          | Serbia         |
| Dr    | Dusanka       | Obradovic       | Institute for Pulmonary Disease                                     | Serbia         |
|       | Vesna         | Turkulov        | Clinical Center of Vojvodina                                        | Serbia         |
| Prof  | Ivana         | Stankovic       | Clinical Center Nis                                                 | Serbia         |
| Dr    | Tatjana       | Adzic Vukicevic | University Clinical Center of Serbia                                | Serbia         |
| Dr    | Jose Angel    | Martín Oterino  | Hospital Universitario de Salamanca                                 | Spain          |
| Dr    | Enrique       | Miguez Rey      | CHU A Coruña                                                        | Spain          |
| Dr    | Vicente       | Estrada Pérez   | Hospital Clínico San Carlos                                         | Spain          |
| Dr    | Santiago      | Moreno Guillén  | Hospital Universitario Ramón y Cajal                                | Spain          |
| Mr    | Francisco     | Fanjul Losa     | Hospital Universitario Son Espases                                  | Spain          |
| Dr    | Alberto       | Romero Palacios | Hospital Universitario de Puerto Real - Infectious diseases         | Spain          |
| Dr    | Esther        | Calbo Sebastián | Hospital Universitario Mutua de Terrassa                            | Spain          |
| Dr    | Pablo         | Ryan            | Hospital Universitario Infanta Leonor                               | Spain          |
| Dr    | Nicolas       | Merchant        | H U Nuestra Señora de Valme - Infectious Diseases                   | Spain          |
| Dr    | David         | Ramos Barbón    | Hospital Santa Creu i Sant Pau                                      | Spain          |
| Prof  | Tom           | Wilkinson       | Southampton General Hospital                                        | United Kingdom |
| Dr    | Davinder      | Dosanjh         | Queen Elizabeth Hospital Birmingham                                 | United Kingdom |
| Dr    | Michael       | Crooks          | Castle Hill Hospital                                                | United Kingdom |
| Dr    | Christopher J | Duncan          | Newcastle University - Institute of Cellular Medicine (ICM)         | United Kingdom |
| Dr    | David         | Jackson         | Guy's Hospital                                                      | United Kingdom |
| Dr    | Najib         | Rahman          | Churchill Hospital                                                  | United Kingdom |
| Dr    | Brendan       | Healy           | Morrison Hospital Swansea NHS Trust                                 | United Kingdom |
| Dr    | Robert        | Willington      | The Royal Bournemouth & Christchurch Hospitals NHS Foundation Trust | United Kingdom |
| Prof  | Chris         | Brightling      | Glenfield General Hospital - Pharmacy Stores                        | United Kingdom |
|       | Gemma         | Hayes           | Plymouth Hospitals NHS Trust - Derriford Hospital                   | United Kingdom |
| Dr    | David         | Chadwick        | The James Cook University Hospital                                  | United Kingdom |
| Dr    | Hannah        | Bayes           | Glasgow Royal Infirmary                                             | United Kingdom |
| Dr    | Kanwal        | Khalil          | University Hospital of North Durham                                 | United Kingdom |
| Dr    | Omar          | Touma           | Wexham Park Hospital                                                | United Kingdom |
| Dr    | George        | Evetts          | Frimley Park Hospital                                               | United Kingdom |
| Dr    | Tom           | Simpson         | University Hospital Lewisham                                        | United Kingdom |

| <b>Title</b> | <b>First Name</b> | <b>Last Name</b> | <b>Address</b>                                                                   | <b>Country</b> |
|--------------|-------------------|------------------|----------------------------------------------------------------------------------|----------------|
| Dr           | Dominick          | Shaw             | Nottingham University Hospitals NHS Trust                                        | United Kingdom |
| Dr           | Alison            | Uriel            | North Manchester General Hospital                                                | United Kingdom |
| Dr           | Raymond           | Sheridan         | Royal Devon & Exeter Hospital                                                    | United Kingdom |
| Dr           | David             | Brabham          | PharmaTex Research, LLC                                                          | United States  |
| Dr           | John              | McKinnon         | Henry Ford Health System                                                         | United States  |
| Dr           | Linda             | Rogers           | Icahn School of Medicine at Mount Sinai (ISMMS) - The Mount Sinai Hospital (MSH) | United States  |
| Dr           | Monica            | Kraft            | Banner University of Arizona Medical Center                                      | United States  |
| Dr           | Sameh             | Hozayen          | M Health Fairview University of Minnesota Medical Center                         | United States  |
| Dr           | Fadi              | Saba             | Professional Health Care of Pinellas                                             | United States  |

## Methods

### Summary of protocol amendments

Table S1. Summary of protocol amendments.

| Amendment number | Amendments                                                                                                                                                                                                                                                                                                                                                                                                                                                                                                                                                                                                                                                                                                                                                                                                                                                                                                                                                                                                                                                                                                                                                                                                                                                                                                                                                                           | Date        |
|------------------|--------------------------------------------------------------------------------------------------------------------------------------------------------------------------------------------------------------------------------------------------------------------------------------------------------------------------------------------------------------------------------------------------------------------------------------------------------------------------------------------------------------------------------------------------------------------------------------------------------------------------------------------------------------------------------------------------------------------------------------------------------------------------------------------------------------------------------------------------------------------------------------------------------------------------------------------------------------------------------------------------------------------------------------------------------------------------------------------------------------------------------------------------------------------------------------------------------------------------------------------------------------------------------------------------------------------------------------------------------------------------------------|-------------|
| 1                | Following discussions with regulatory authorities the study design was simplified, with one dose level of SNG001 tested instead of two. Under the previous design, SNG001 was to be administered at the current dose (the contents of two syringes), and at half the current dose (the contents of one syringe), with each SNG001 dose requiring administration of matching placebo. In addition to simplifying dosing, the removal of one dose level also decreased the number of patients required to be recruited. In addition, the order of the key secondary endpoints was altered, an interim analysis was introduced to test for futility, and an antigen test was included as evidence of positive SARS-CoV-2 status. Text was edited for clarity and consistency.                                                                                                                                                                                                                                                                                                                                                                                                                                                                                                                                                                                                           | 27 Nov 2020 |
| 2                | <p>Again, following discussions with regulatory agencies, time to hospital discharge was elevated from key secondary to primary endpoint (the study was already sufficiently powered, based on the assumptions for the existing primary endpoint, time to recovery), and the progression to intubation or death, and death secondary endpoints were elevated to key secondary endpoints (with a Hochberg procedure and gatekeeping strategy added to ensure the global alpha level was maintained).</p> <p>The original sample size calculation was as follows: A sample size of approximately 610 patients in total using a 1:1 randomisation ratio would provide at least 90% power to detect a hazard ratio of 1.7 in time to recovery. This sample size was calculated using a global two-sided alpha level of 0.05 and allowed for an interim analysis to assess futility. This sample size assumed a recovery rate in the placebo treatment arm of 29% at Day 28 and a dropout rate of 25% spread uniformly over the 28-day study period.</p> <p>The daily assessment of COVID-19 symptoms and limitation of usual activities was added as a secondary endpoint. In addition, the World Health Organization (WHO) Ordinal Scale of Clinical Improvement (OSCI) assessments were to continue until Day 35 (instead of Day 28). Text was edited for clarity and consistency.</p> | 21 Dec 2020 |
| 3                | An exclusion criterion that prevented patients who had a previous SARS-CoV-2 vaccination from taking part in the study was removed. Text was edited for clarity and consistency.                                                                                                                                                                                                                                                                                                                                                                                                                                                                                                                                                                                                                                                                                                                                                                                                                                                                                                                                                                                                                                                                                                                                                                                                     | 22 Feb 2021 |
| 4                | Additional guidance was provided on conducting various assessments, the importance of maintaining contact with patients throughout the 90-day follow-up period was emphasised, and additional guidance on the role of the Independent Data Monitoring Committee/Data Safety Monitoring Committee was provided. Text was edited for clarity and consistency.                                                                                                                                                                                                                                                                                                                                                                                                                                                                                                                                                                                                                                                                                                                                                                                                                                                                                                                                                                                                                          | 9 Sep 2021  |

## Inclusion criteria

1. Male or female,  $\geq 18$  years of age at the time of consent.
2. Admitted to hospital due to the severity of their COVID-19.
3. Positive virus test for SARS-CoV-2 using a validated molecular assay or validated antigen assay.

Patients who had a positive virus test for SARS-CoV-2 prior to hospitalisation were to be randomised no later than 48 hours after hospital admission. If the virus test was performed more than 96 hours prior to hospitalisation, the test was to be repeated in the hospital prior to randomisation. Only patients whose repeated virus test is positive were randomised, no later than 48 hours after confirmation of SARS-CoV-2 infection.

Patients who had their first positive virus test for SARS-CoV-2 after hospitalisation were randomised, no later than 48 hours after confirmation of SARS-CoV-2 infection.

4. Required oxygen therapy via nasal prongs or mask (WHO OSCI score of 4).
5. Provided informed consent.
6. Female patients were  $\geq 1$  year post-menopausal, surgically sterile, or using a defined highly effective method of contraception.
7. Women not of childbearing potential were defined as women either permanently sterilised (hysterectomy, bilateral oophorectomy, or bilateral salpingectomy), or who were postmenopausal.

If, in the setting of the pandemic, the use of an acceptable birth control method was not possible, the decision to enrol a woman of childbearing potential was based on the benefit-risk for the patient, which was discussed with the patient at the time of the informed consent.

## Exclusion Criteria

1. Evidence of ongoing SARS-CoV-2 infection for more than three weeks, confirmed by a validated molecular assay or validated antigen assay.



2. Non-invasive ventilation (continuous positive airway pressure/bilevel positive airway pressure) or high-flow nasal oxygen therapy (WHO OSCI score of 5).
3. Endotracheal intubation and invasive mechanical ventilation (WHO OSCI score of  $\geq 6$ ) or admission to intensive care.
4. Previous SARS-CoV-2 infection confirmed by a validated molecular assay or validated antigen assay.
5. Any condition, including findings in the patient's medical history or in the pre-randomisation study assessments that in the opinion of the investigator, constituted a risk or a contraindication for the participation of the patient into the study or that could interfere with the study objectives, conduct or evaluation.
6. Participation in previous clinical trials of SNG001.
7. Current or previous participation in another clinical trial where the patient received a dose of an investigational medicinal product (IMP) containing small molecules within 30 days or five half-lives (whichever is longer) prior to entry into this study or containing biologicals within 3 months prior to entry into this study.
8. Inability to use a nebuliser with a mouthpiece.
9. Inability to comply with the requirements for storage conditions of study medication in the home setting.
10. History of hypersensitivity to natural or recombinant interferon- $\beta$  or to any of the excipients in the drug preparation.
11. Females who were breast-feeding, lactating, pregnant or intending to become pregnant.

## WHO OCSI

The WHO OSCI is a nine-point scale (0, no clinical or virological evidence of infection; 8, death) as described in the February 2020 WHO R&D Blueprint for Novel Coronavirus [1], and was assessed either face-to-face or by telephone/video link by a clinically qualified member of the study team.

| Patient State | Descriptor                                                                                                                     | Score |
|---------------|--------------------------------------------------------------------------------------------------------------------------------|-------|
| Uninfected    | No clinical or virological evidence of infection                                                                               | 0     |
| Ambulatory    | No limitation of activities                                                                                                    | 1     |
|               | Limitation of activities                                                                                                       | 2     |
| Hospitalised  | Hospitalised, no oxygen therapy                                                                                                | 3     |
|               | Oxygen by mask or nasal prongs                                                                                                 | 4     |
|               | Non-invasive ventilation or high-flow oxygen                                                                                   | 5     |
| Hospitalised  | Intubation and mechanical ventilation                                                                                          | 6     |
|               | Ventilation + additional organ support – pressors, renal replacement therapy (RRT), extracorporeal membrane oxygenation (ECMO) | 7     |
| Dead          | Death                                                                                                                          | 8     |

To allow a consistent approach to the OSCI assessment for patients that were discharged from hospital, on the day of hospital discharge and on the days following hospital discharge patients were asked the following questions about their clinical status and return to the pre-COVID-19 level of activity:

- “In the past 24 hours, did you experience any signs or symptoms of your coronavirus infection?” (Yes/No)
- “In the past 24 hours, did you feel that your usual activities (e.g. work, study, housework, family or leisure activities) have returned to the level from before your coronavirus infection and did not require additional assistance/support\*?” (Yes/No)

\*Assistance/support was defined as additional help of other people and/or requirement for supplemental oxygen (or a higher level of supplemental oxygen), compared to the pre-COVID-19 state.

To minimise any potential influence on the patients, trial staff read the questions to patients verbatim. The below scoring algorithm was applied.

| Presence of signs/symptoms of coronavirus infection (or virological evidence of infection)? | Usual activities returned to baseline level? | WHO OSCI score |
|---------------------------------------------------------------------------------------------|----------------------------------------------|----------------|
| No                                                                                          | Yes                                          | 0              |
| Yes                                                                                         | Yes                                          | 1              |
| No                                                                                          | No                                           | 2              |
| Yes                                                                                         | No                                           | 2              |

## BCSS

Patients were asked by trained staff to report the severity of breathlessness, cough and sputum symptoms, each on a five-point scale with higher scores indicating more severe symptoms [2].

### 1. How much difficulty did you have breathing today?

- 0 = None – unaware of any difficulty
- 1 = Mild – noticeable when performing strenuous activity (e.g. running)
- 2 = Moderate – noticeable even when performing light activity (e.g. bedmaking or carrying groceries)
- 3 = Marked – noticeable when washing or dressing
- 4 = Severe – almost constant, present even when resting

### 2. How was your cough today?

- 0 = No cough – unaware of coughing
- 1 = Rare – cough now and then
- 2 = Occasional – less than hourly
- 3 = Frequent – one or more times an hour
- 4 = Almost constant – never free of cough or need to cough

### 3. How much trouble did you have due to sputum today?

- 0 = None – unaware of any trouble
- 1 = Mild – rarely caused trouble
- 2 = Moderate – noticeable trouble
- 3 = Marked – caused a great deal of trouble
- 4 = Severe – almost constant trouble

## NEWS2

NEWS2 is a tool developed by the Royal College of Physicians that aggregates physiological measurements which are already recorded in routine practice [3]. The highest NEWS2 score for each calendar day was collected; data were not recorded after discharge.

Six simple physiological parameters form the basis of the scoring system:

1. Respiration rate
2. Oxygen saturation
3. Any supplementary oxygen
4. Temperature
5. Systolic blood pressure
6. Heart rate
7. Alert, Voice, Pain, Unresponsive.

## COVID-19 symptom assessment

|                                         |                           |                          |                                   |                           |                          |
|-----------------------------------------|---------------------------|--------------------------|-----------------------------------|---------------------------|--------------------------|
| Fever/feeling feverish                  | <input type="radio"/> Yes | <input type="radio"/> No | Wheezing                          | <input type="radio"/> Yes | <input type="radio"/> No |
| Cough                                   | <input type="radio"/> Yes | <input type="radio"/> No | Chest Pain                        | <input type="radio"/> Yes | <input type="radio"/> No |
| Cough with sputum                       | <input type="radio"/> Yes | <input type="radio"/> No | Muscle aches<br>(myalgia)         | <input type="radio"/> Yes | <input type="radio"/> No |
| Cough with bloody<br>sputum/haemoptysis | <input type="radio"/> Yes | <input type="radio"/> No | Joint pain<br>(arthralgia)        | <input type="radio"/> Yes | <input type="radio"/> No |
| Sore throat                             | <input type="radio"/> Yes | <input type="radio"/> No | Fatigue/ malaise                  | <input type="radio"/> Yes | <input type="radio"/> No |
| Runny nose<br>(rhinorrhoea)             | <input type="radio"/> Yes | <input type="radio"/> No | Shortness of Breath<br>(dyspnoea) | <input type="radio"/> Yes | <input type="radio"/> No |
| Ear pain                                | <input type="radio"/> Yes | <input type="radio"/> No | Loss of smell<br>and/or taste     | <input type="radio"/> Yes | <input type="radio"/> No |
| Headache                                | <input type="radio"/> Yes | <input type="radio"/> No | Vomiting/nausea                   | <input type="radio"/> Yes | <input type="radio"/> No |
| Other                                   | <input type="radio"/> Yes | <input type="radio"/> No |                                   |                           |                          |

If 'other', specify here:

## Statistical methods

Covariate-adjusted differences in proportions were derived from the logistic model estimates, and were formally assessed for statistical significance with a gatekeeping strategy. The proportions of patients recovering, or discharged from hospital were assessed using logistic regression models, and the improvement in OSCI score was assessed using ordinal logistic regression models. The change in BCSS was assessed using mixed models for repeated measures (MMRM). All other secondary endpoints were summarised descriptively only. For the handling of missing data see the supplement.

For the primary endpoints, patients who died were censored at 28 days, the maximum time to event allowed by the study design (note that as hospital discharge or recovery had to be sustained for at least 7 days, the latest timepoint at which a patient could be discharged or recover to be considered in the primary endpoints was Day 28). For analyses using the WHO OSCI, including the primary and key secondary endpoints, patients with a WHO OSCI score of 8, indicating death, had subsequent missing WHO OSCI assessments imputed as 8. In addition, if other data sources such as adverse events indicated a patient died, all missing WHO OSCI scores on and after the date of death were imputed as 8. Other missed OSCI assessments were not imputed for the primary endpoints, but hospital discharge was confirmed by the patient's location, and recovery was only confirmed if sufficient non-missing data were available. Patients who could not be confirmed as discharged/recovered or who withdrew from the study within 7 days of the event were treated as censored at the date last known to be hospitalised/not recovered. Key secondary endpoints were derived using observed data. For BCSS, missing breathless scores were imputed as 4 if the WHO OSCI score at the corresponding visit was  $\geq 5$ , with cough and sputum scores considered missing at random and total scores calculated by summing the imputed symptom scores, where possible. Missing breathlessness, cough and sputum scores at all other visits were considered missing at random and were imputed, but were accounted for by the MMRM analysis.

## Results

Table S2. Reasons for exclusion from the per-protocol population.

| Reason                                                                                    | Treatment group |        |
|-------------------------------------------------------------------------------------------|-----------------|--------|
|                                                                                           | Placebo         | SNG001 |
| Clinical practice had a potential impact on efficacy assessment                           | 1               | 1      |
| Patient or relatives declined advanced respiratory support                                | 0               | 3      |
| Failed to receive two full doses of study medication in the first three days of treatment | 36              | 31     |
| Discharged from hospital for reason other than severity of condition                      | 15              | 16     |
| No positive SARS-CoV-2 result                                                             | 0               | 1      |
| Patient first reported symptoms more than three weeks prior to randomisation              | 1               | 0      |
| Received study medication that was outside of temperature range                           | 0               | 1      |

Table S3. Proportions of patients recovering or discharged from hospital, and changes from baseline in BCSS score (intention-to-treat population).

| Parameter                                                                 | Placebo plus<br>SoC<br>(N=314) | SNG001 plus<br>SoC<br>(N=309) | SNG001 vs placebo<br>difference |
|---------------------------------------------------------------------------|--------------------------------|-------------------------------|---------------------------------|
| Patients recovering (WHO OSCI score $\leq 1$ sustained for $\geq 7$ days) |                                |                               |                                 |
| At Day 7                                                                  | 17 (5.4%)                      | 28 (9.1%)                     | 1.71 (0.90, 3.22); 0.101        |
| At Day 14                                                                 | 73 (23.2%)                     | 75 (24.3%)                    | 0.99 (0.67, 1.45); 0.942        |
| At Day 21                                                                 | 118 (37.6%)                    | 117 (37.9%)                   | 0.96 (0.68, 1.35); 0.824        |
| At Day 28                                                                 | 151 (48.1%)                    | 145 (46.9%)                   | 0.92 (0.66, 1.28); 0.613        |
| Patients discharged from hospital                                         |                                |                               |                                 |
| At Day 7                                                                  | 141 (44.9%)                    | 154 (49.8%)                   | 1.18 (0.85, 1.64); 0.323        |
| At Day 14                                                                 | 223 (71.0%)                    | 231 (74.8%)                   | 1.17 (0.81, 1.70); 0.406        |
| At Day 21                                                                 | 249 (79.3%)                    | 245 (79.3%)                   | 0.96 (0.64, 1.43); 0.828        |
| At Day 28                                                                 | 255 (81.2%)                    | 249 (80.6%)                   | 0.92 (0.61, 1.40); 0.706        |
| Change from baseline in BCSS total score                                  |                                |                               |                                 |
| At Day 7                                                                  | -2.2<br>(-2.4, -2.0)           | -2.1<br>(-2.3, -1.9)          | 0.1<br>(-0.3, 0.4); 0.726       |
| At Day 14                                                                 | -3.0<br>(-3.2, -2.8)           | -2.9<br>(-3.1, -2.6)          | 0.2<br>(-0.2, 0.5); 0.354       |
| Days 2–15                                                                 | -2.2<br>(-2.4, -2.1)           | -2.1<br>(-2.3, -2.0)          | 0.1<br>(-0.1, 0.3); 0.410       |
| Change from baseline in BCSS breathlessness score                         |                                |                               |                                 |
| At Day 7                                                                  | -0.71<br>(-0.83, -0.59)        | -0.75<br>(-0.88, -0.63)       | -0.04<br>(-0.22, 0.13); 0.627   |
| At Day 14                                                                 | -0.99<br>(-1.12, -0.86)        | -1.03<br>(-1.16, -0.91)       | -0.04<br>(-0.22, 0.14); 0.635   |
| Days 2–15                                                                 | -0.75<br>(-0.85, -0.65)        | -0.78<br>(-0.87, -0.68)       | -0.03<br>(-0.17, 0.11); 0.699   |
| Change from baseline in BCSS cough score                                  |                                |                               |                                 |
| At Day 7                                                                  | -0.93<br>(-1.03, -0.82)        | -0.84<br>(-0.94, -0.73)       | 0.09<br>(-0.06, 0.24); 0.255    |
| At Day 14                                                                 | -1.31<br>(-1.42, -1.21)        | -1.17<br>(-1.28, -1.07)       | 0.14<br>(-0.01, 0.29); 0.065    |
| Days 2–15                                                                 | -0.93<br>(-1.01, -0.86)        | -0.84<br>(-0.91, -0.76)       | 0.10<br>(-0.01, 0.20); 0.063    |
| Change from baseline in BCSS sputum score                                 |                                |                               |                                 |
| At Day 7                                                                  | -0.44<br>(-0.52, -0.37)        | -0.43<br>(-0.50, -0.35)       | 0.02<br>(-0.09, 0.12); 0.757    |

| Parameter | Placebo plus<br>SoC<br>(N=314) | SNG001 plus<br>SoC<br>(N=309) | SNG001 vs placebo<br>difference |
|-----------|--------------------------------|-------------------------------|---------------------------------|
| At Day 14 | -0.60<br>(-0.67, -0.53)        | -0.56<br>(-0.63, -0.48)       | 0.05<br>(-0.06, 0.15); 0.377    |
| Days 2–15 | -0.46<br>(-0.51, -0.40)        | -0.42<br>(-0.48, -0.37)       | 0.04<br>(-0.04, 0.11); 0.350    |

Treatment group data are number of patients (%) or least squares mean (95% confidence interval). SNG001 vs placebo differences are odds ratio (95% CI); p value, except for BCSS endpoints, which are least squares mean (95% confidence interval); p value. SoC, standard of care; WHO OSCI, World Health Organization Ordinal Scale of Clinical Improvement; BCSS, Breathlessness, Cough and Sputum Scale.



Figure S1. Patients categorised by WHO OSCI score at baseline and Days 7, 14, 21 and 28, with odds ratio for a better outcome (intention-to-treat population).

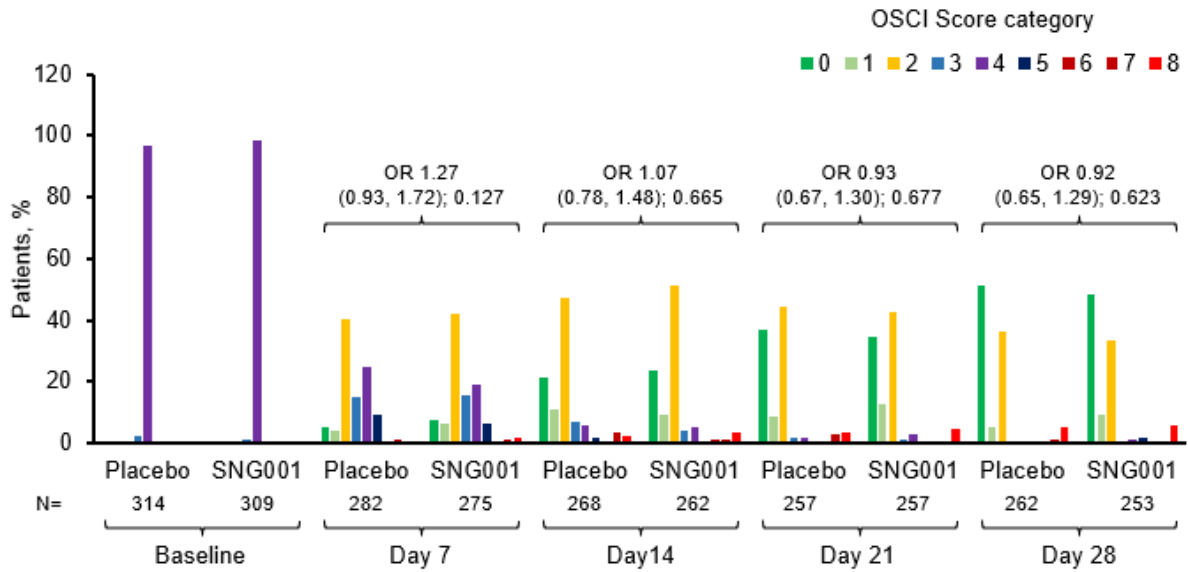

WHO OSCI, World Health Organization Ordinal Scale of Clinical Improvement (0 = No clinical or virological evidence of infection; 1 = No limitation of activities; 2 = Limitation of activities; 3 = Hospitalised – no oxygen therapy; 4 = Oxygen by mask or nasal prongs; 5 = Non-invasive ventilation, or high flow oxygen; 6 = Intubation and mechanical ventilation; 7 = Ventilation plus additional organ support; 8 = Death); OR, odds ratio.

Figure S2. Change from baseline in Breathlessness, Cough and Sputum Scale.

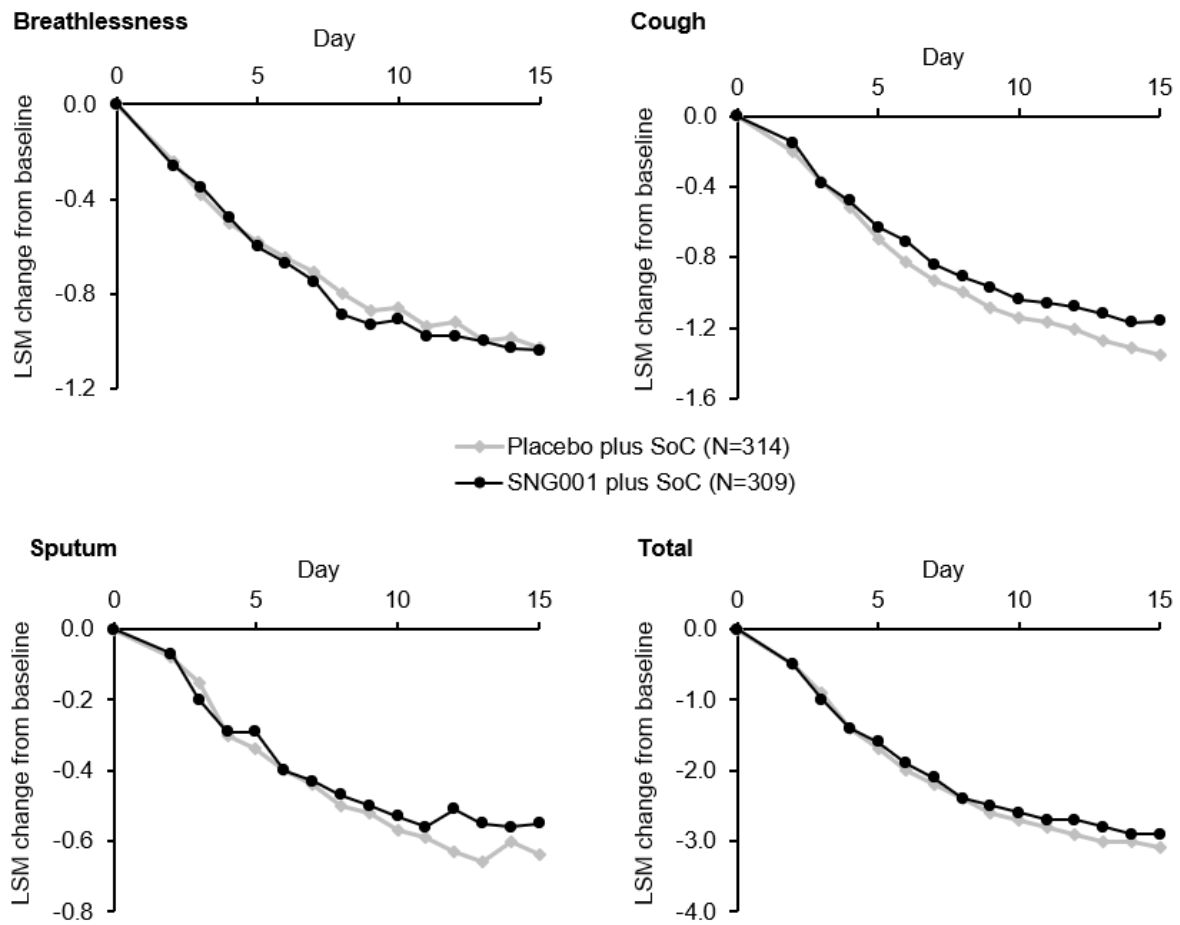

SoC, standard of care; LSM, least squares mean.

Figure S3. Mean change from baseline in National Early Warning System-2 score during the hospitalisation period.

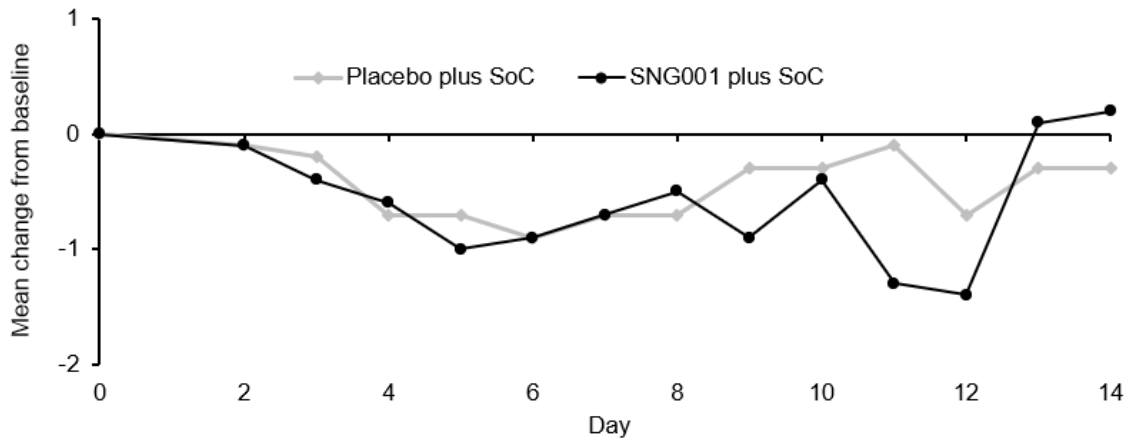

|                |     |     |     |     |     |    |    |    |    |    |    |    |    |
|----------------|-----|-----|-----|-----|-----|----|----|----|----|----|----|----|----|
| Placebo N= 305 | 182 | 171 | 141 | 116 | 103 | 87 | 74 | 57 | 47 | 43 | 40 | 36 | 30 |
| SNG001 N=302   | 181 | 168 | 150 | 127 | 97  | 75 | 55 | 46 | 38 | 35 | 28 | 21 | 17 |

Note: Data are presented up to Day 14 only. After this timepoint, too few patients have available data for meaningful interpretation of the results (mainly due to hospital discharge). SoC, standard of care.

Figure S4. Proportion of patients with any COVID-19 related symptom.

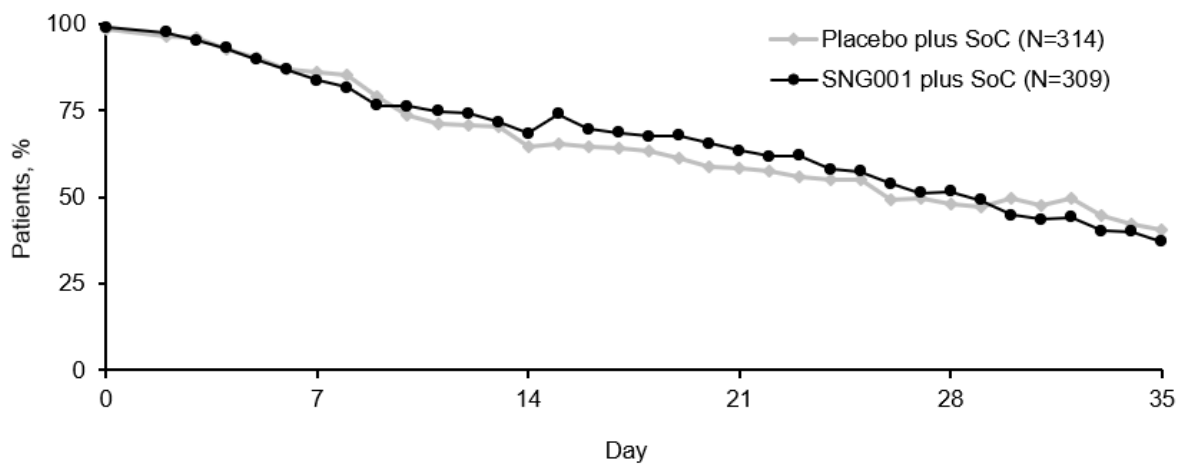

SoC, standard of care.

Table S4. EuroQol 5-dimension 5-level change from baseline (intention-to-treat population).

| Parameter                    | Placebo plus SoC<br>(N=314) | SNG001 plus SoC<br>(N=309) |
|------------------------------|-----------------------------|----------------------------|
| UK Crosswalk Index           |                             |                            |
| At Day 7                     | 0.14 (0.293)                | 0.14 (0.267)               |
| At Day 15 (end of treatment) | 0.21 (0.288)                | 0.24 (0.253)               |
| At Day 28 (follow-up)        | 0.28 (0.282)                | 0.26 (0.266)               |
| Visual analogue scale        |                             |                            |
| At Day 7                     | 13.1 (18.53)                | 15.8 (19.96)               |
| At Day 15 (end of treatment) | 20.9 (19.17)                | 22.8 (19.87)               |
| At Day 28 (follow-up)        | 24.8 (20.84)                | 26.7 (20.26)               |

Data are mean (standard deviation). SoC, standard of care.

Figure S5. Mean change from baseline in EuroQol 5-dimension 5-level usual activities subscale.

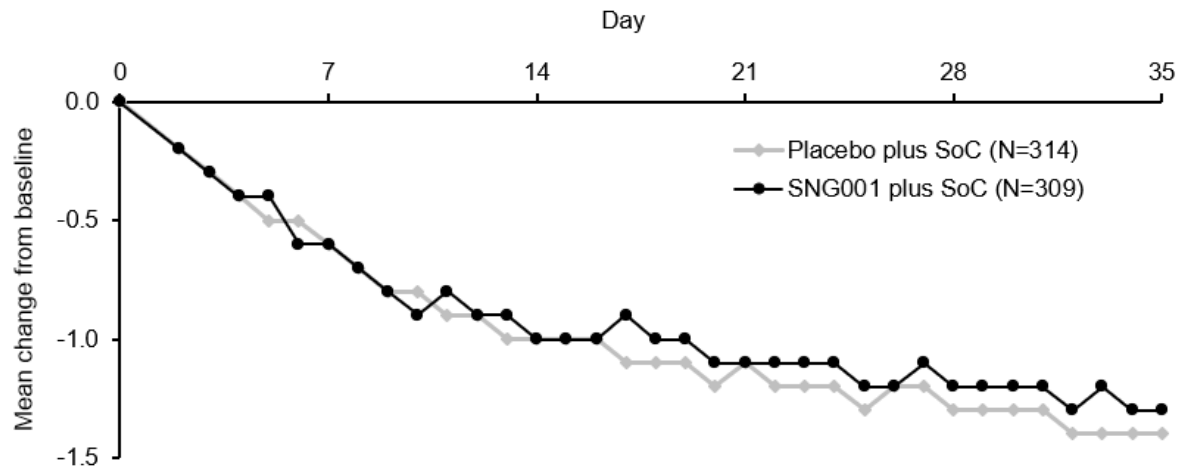

SoC, standard of care.

Figure S6. Time to hospital discharge in the placebo plus standard of care groups in UK sites of the current study, and in the previous Phase II study.

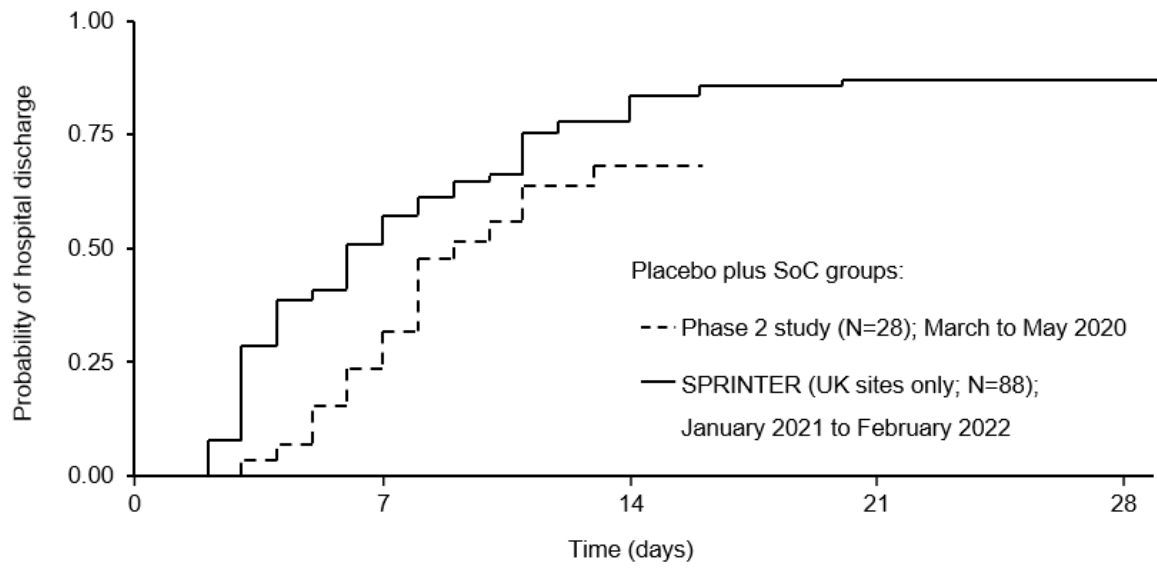

SoC, standard of care.

## References

1. World Health Organization. WHO R&D Blueprint: Novel coronavirus [Internet]. 2020 [cited 2022 Jul 27]. Available from: <https://www.who.int/publications/i/item/covid-19-therapeutic-trial-synopsis>.
2. Leidy NK, Rennard SI, Schmier J, Jones MKC, Goldman M. The Breathlessness, Cough, and Sputum Scale. The development of empirically based guidelines for interpretation. *Chest* 2003; 124: 2182–2191.
3. Royal College of Physicians. National Early Warning Score (NEWS) 2: Standardising the assessment of acute-illness severity in the NHS. Updated report of a working party. 2017.
